# Supplementary material
Source: PubMed Central journal article supplement (PMC8026569)
Supplement: NIHMS1655922-supplement-1.pdf [file NIHMS1655922-supplement-1.pdf]

**A. DU-145**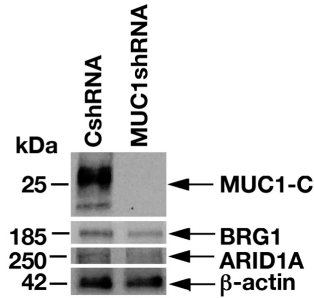**B. BT-549**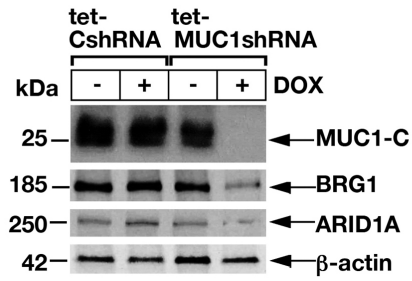**C. SW620**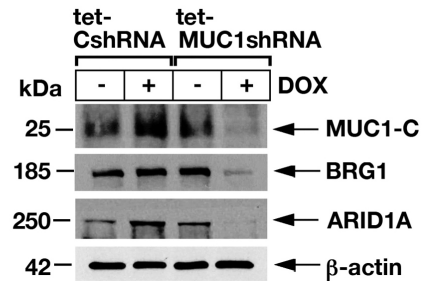

**Figure S1. Targeting MUC1-C downregulates BRG1 and ARID1A expression in different types of carcinoma cells.** A. Lysates from DU-145 cells stably expressing a CshRNA or MUC1shRNA were immunoblotted with antibodies against the indicated proteins. B and C. BT-549 TNBC (B) and SW620 colon cancer (C) cells expressing a control tet-CshRNA or tet-MUC1shRNA were treated with vehicle or DOX for 7 days. Lysates were immunoblotted with antibodies against the indicated proteins.

**A. LNCaP/tet-MUC1-C**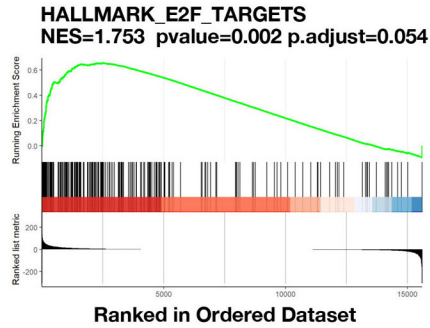**B. DU-145**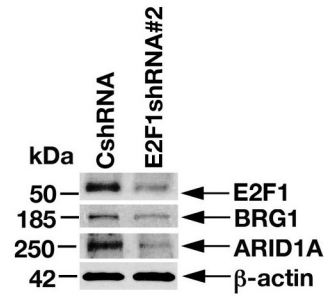**C. BT-549**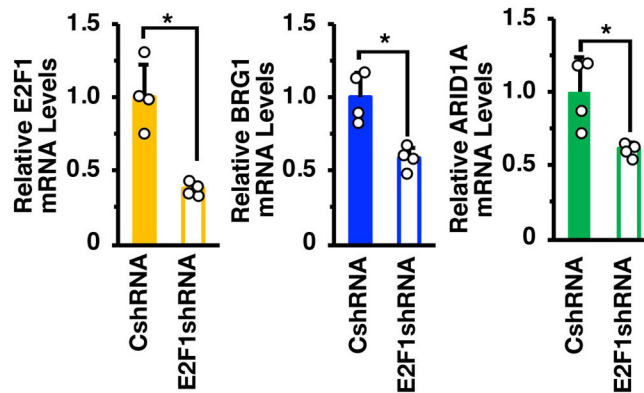**D. BT-549**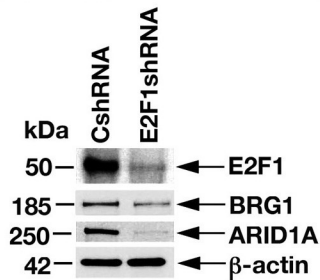**E. LNCaP/tet-MUC1-C(AQA)**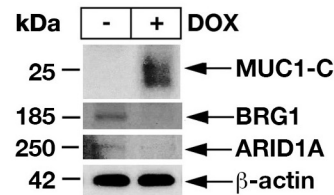

**Figure S2. E2F1 regulates BRG1 and ARID1A expression.** A. RNA-seq was performed in triplicate on LNCaP/tet-MUC1-C cells treated with vehicle or DOX for 7 days. The datasets were analyzed with GSEA using the Hallmark gene signature collection for E2F Targets. B. Lysates from DU-145 cells expressing a second E2F1shRNA#2 were immunoblotted with antibodies against the indicated proteins. C. BT-549/CshRNA and BT-549/E2F1shRNA cells were analyzed for the indicated mRNA levels by qRT-PCR. The results (mean±SD of 4 determinations) are expressed as relative mRNA levels compared to that in control cells (assigned a value of 1). D. Lysates from BT-549/CshRNA and BT-549/E2F1shRNA cells were immunoblotted with antibodies against the indicated proteins. E. Lysates from LNCaP/tet-MUC1-C(AQA) cells treated with vehicle or DOX for 7 days were immunoblotted with antibodies against the indicated proteins.

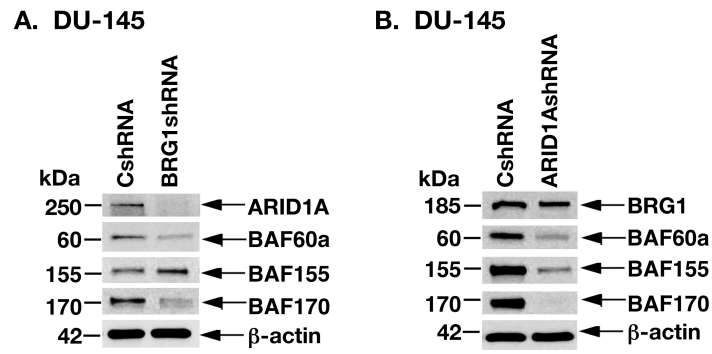

**Figure S3. Effects of silencing BRG1 and ARID1A on expression of other BAF subunits.** A and B. Lysates from DU-145 cells expressing a CshRNA and BRG1shRNA (A) or ARID1AshRNA (B) were immunoblotted with antibodies against the indicated proteins.

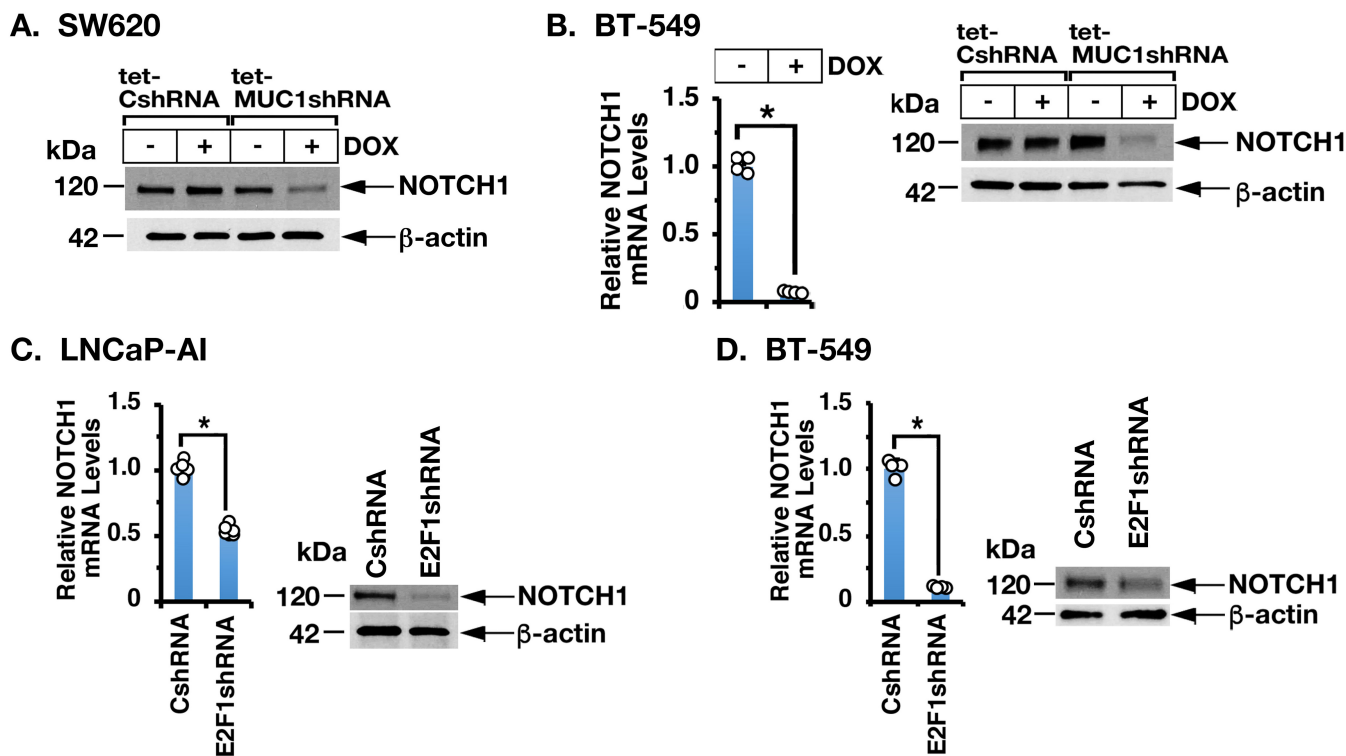

**Figure S4. Silencing MUC1-C and E2F1 downregulates NOTCH1 in carcinoma cells.** A. SW620/tet-CshRNA and SW620/tet-MUC1shRNA cell were treated with vehicle or DOX for 7 days. Lysates were immunoblotted with antibodies against the indicated proteins. B. BT-549/tet-MUC1shRNA cells treated with vehicle or DOX for 7 days were analyzed for NOTCH1 mRNA levels by qRT-PCR. The results (mean±SD of 4 determinations) are expressed as relative mRNA levels compared to that in control cells (assigned a value of 1) (left). Lysates from BT-549/tet-CshRNA and BT-549/tet-MUC1shRNA cells treated with vehicle or DOX for 7 days were immunoblotted with antibodies against the indicated proteins (right). C and D. LNCaP-AI (C) and BT-549 (D) cells expressing a CshRNA or E2F1shRNA were analyzed for NOTCH1 mRNA levels by qRT-PCR. The results (mean±SD of 4 determinations) are expressed as relative mRNA levels compared to that in control cells (assigned a value of 1) (left). Lysates were immunoblotted with antibodies against the indicated proteins (right).

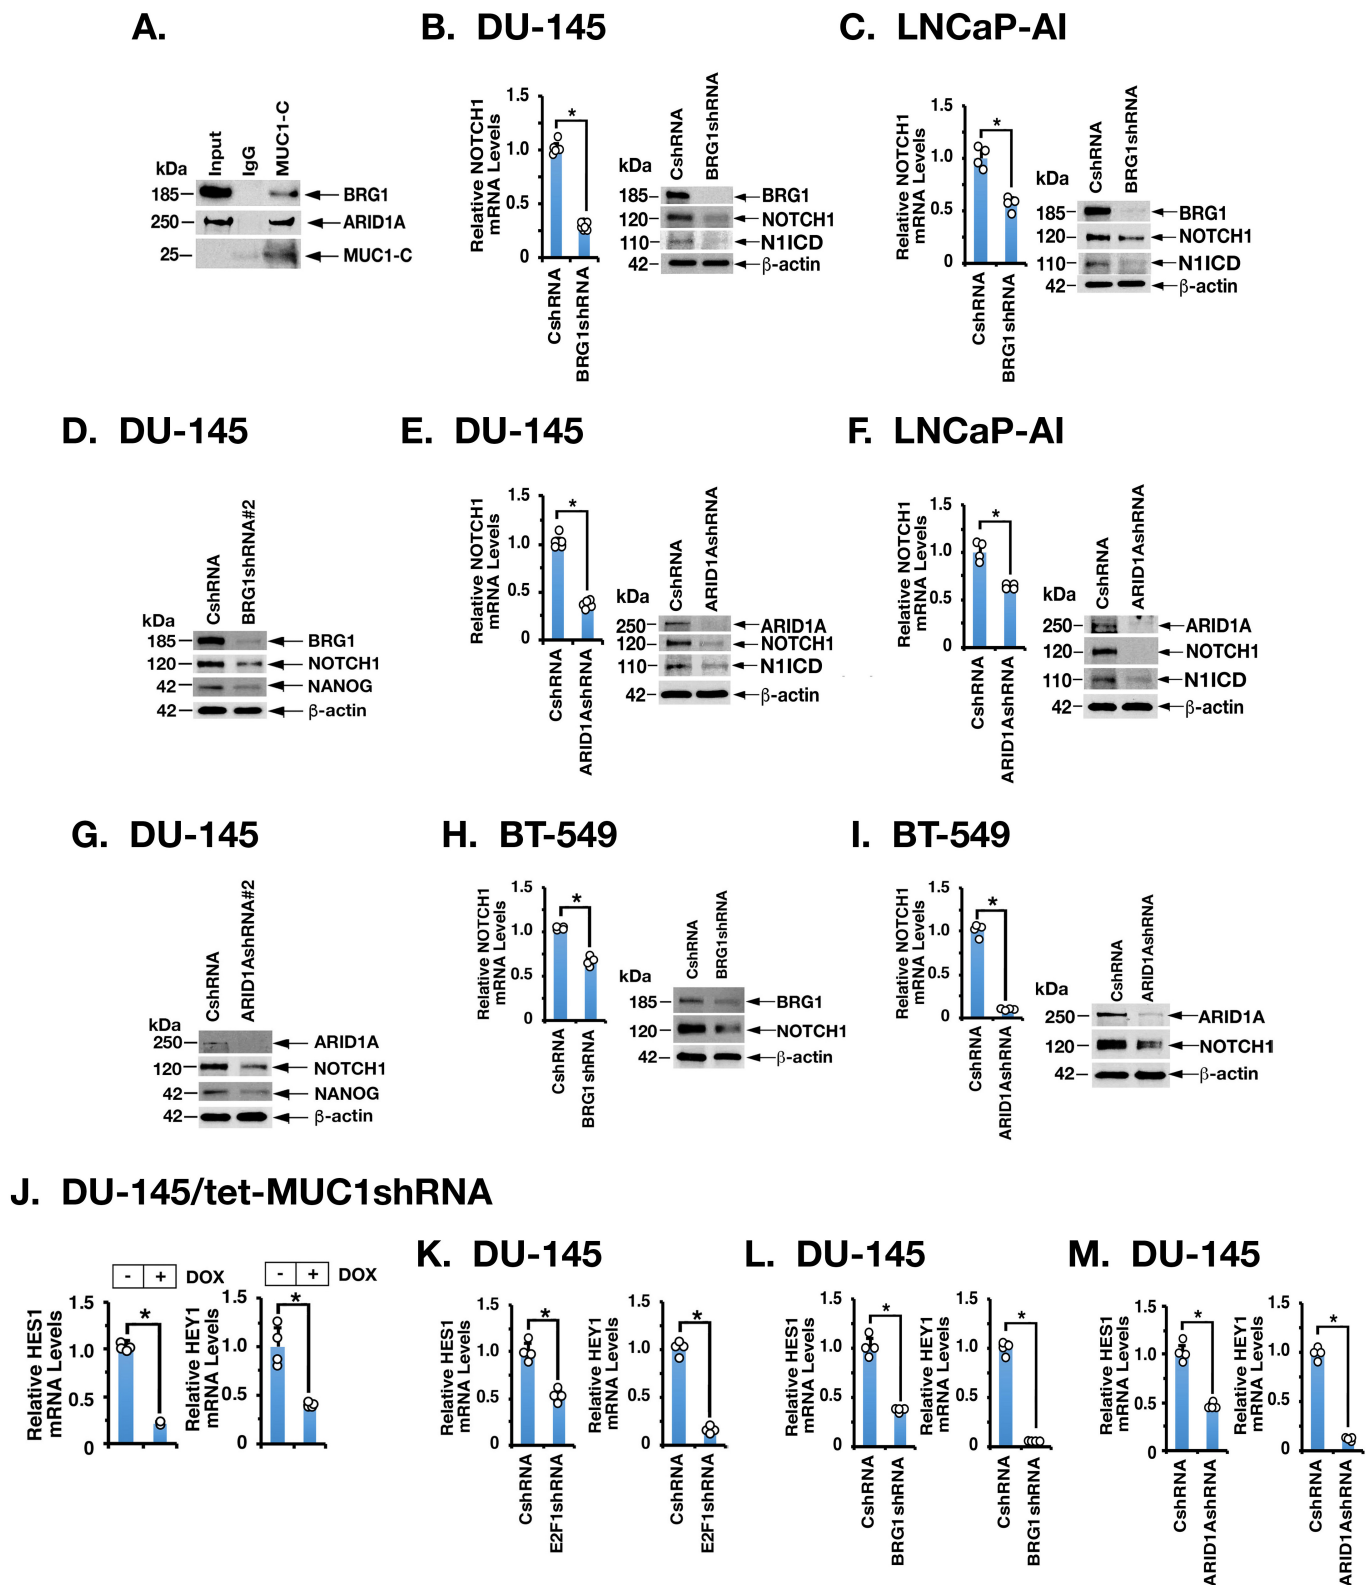

**Figure S5. Effects of targeting the MUC1-C→E2F1→BAF pathway on NOTCH1, HES1 and HEY1 expression.** A. Nuclear lysates from DU-145 cells were incubated with a control IgG and anti-MUC1-C. The input lysate and precipitates were immunoblotted with antibodies against the indicated proteins. B and C. DU-145 (B) and LNCaP-AI (C) cells expressing a CshRNA or BRG1shRNA were analyzed for NOTCH1 mRNA levels by qRT-PCR. The results (mean $\pm$ SD of 4 determinations) are

expressed as relative mRNA levels compared to that in control cells (assigned a value of 1) (left). Lysates were immunoblotted with antibodies against the indicated proteins (right). D. Lysates from DU-145 cells expressing a CshRNA and a second BRG1shRNA#2 were immunoblotted with antibodies against the indicated proteins. E and F. DU-145 (E) and LNCaP-AI (F) cells expressing a CshRNA or ARID1AshRNA were analyzed for NOTCH1 mRNA levels by qRT-PCR. The results (mean±SD of 4 determinations) are expressed as relative mRNA levels compared to that in control cells (assigned a value of 1) (left). Lysates were immunoblotted with antibodies against the indicated proteins (right). G. Lysates from DU-145 cells expressing a CshRNA and a second ARID1AshRNA#2 were immunoblotted with antibodies against the indicated proteins. H and I. BT-549/CshRNA, BT-549/BRG1shRNA (H) and BT-549/ARID1AshRNA (I) cells were analyzed for NOTCH1 mRNA levels by qRT-PCR. The results (mean±SD of 4 determinations) are expressed as relative mRNA levels compared to that in control cells (assigned a value of 1) (left). Lysates were immunoblotted with antibodies against the indicated proteins (right). J. DU-145/tet-MUC1shRNA cells treated with vehicle or DOX for 7 days were analyzed for the indicated mRNA levels by qRT-PCR. The results (mean±SD of 4 determinations) are expressed as relative mRNA levels compared to that in control cells (assigned a value of 1). K. DU-145/CshRNA and DU-145/E2F1shRNA cells were analyzed for the indicated mRNA levels by qRT-PCR. The results (mean±SD of 4 determinations) are expressed as relative mRNA levels compared to that in control cells (assigned a value of 1). L and M. DU-145/CshRNA, DU-145/BRG1shRNA (L) and DU-145/ARID1AshRNA (M) cells were analyzed for the indicated mRNA levels by qRT-PCR. The results (mean±SD of 4 determinations) are expressed as relative mRNA levels compared to that in control cells (assigned a value of 1).

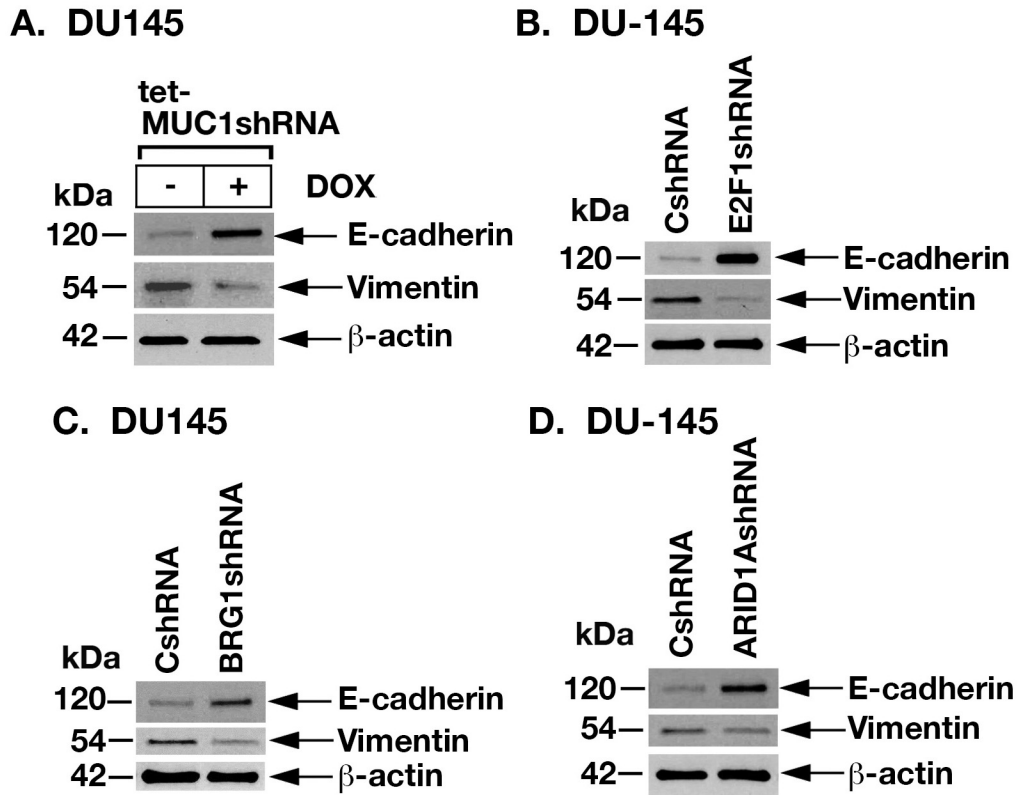

**Figure S6. Targeting the MUC1-C→E2F1→BAF pathway induces E-cadherin and suppresses vimentin expression.** A. Lysates from DU-145/tet-MUC1shRNA cells treated with vehicle or DOX for 7 days were immunoblotted with antibodies against the indicated proteins. B-D. Lysates from DU-145/CshRNA, DU-145/E2F1shRNA (B), DU-145/BRG1shRNA (C) and DU-145/ARID1A1shRNA (D) cells were immunoblotted with antibodies against the indicated proteins.

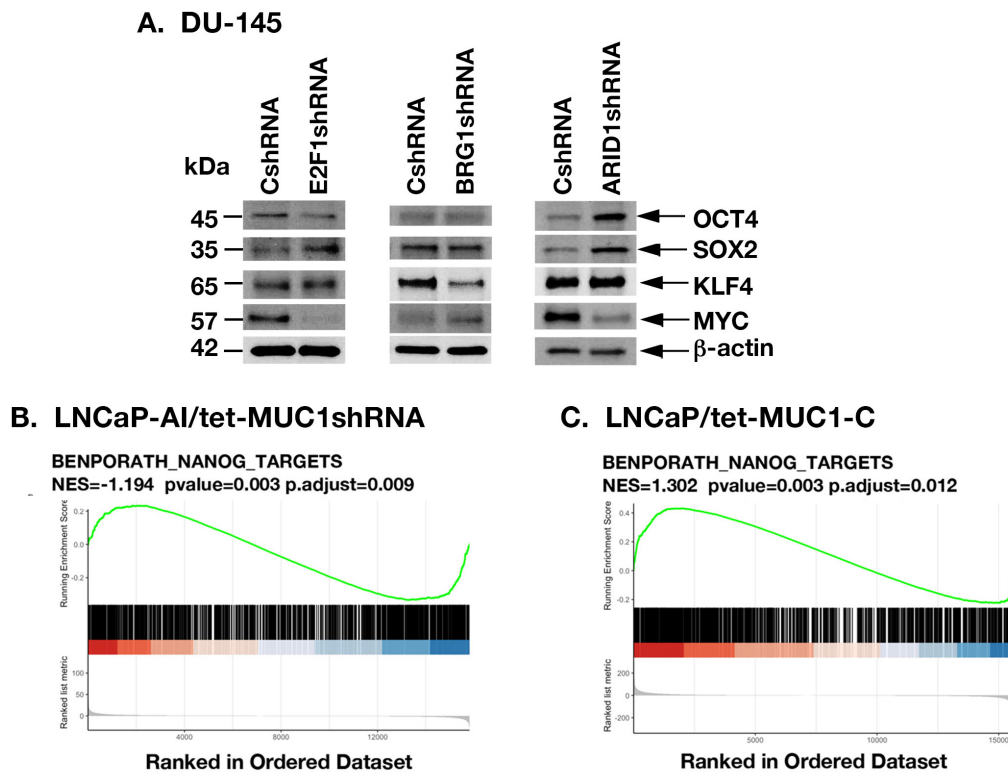

**Figure S7. Effects of the MUC1-C→E2F1®→BAF pathway on OSKM expression and the NANOG TARGETS gene signature.** A. Lysates from DU-145 cells expressing a CshRNA, E2F1shRNA (left), BRG1shRNA (middle) or ARID1AshRNA (right) were immunoblotted with antibodies against the indicated proteins. B and C. RNA-seq was performed in triplicate on LNCaP-AI/tet-MUC1shRNA (B) and LNCaP-AI/tet-MUC1-C (C) cells treated with vehicle or DOX for 7 days. The datasets were analyzed with GSEA using the BENPORATH\_NANOG\_TARGETS gene signature.



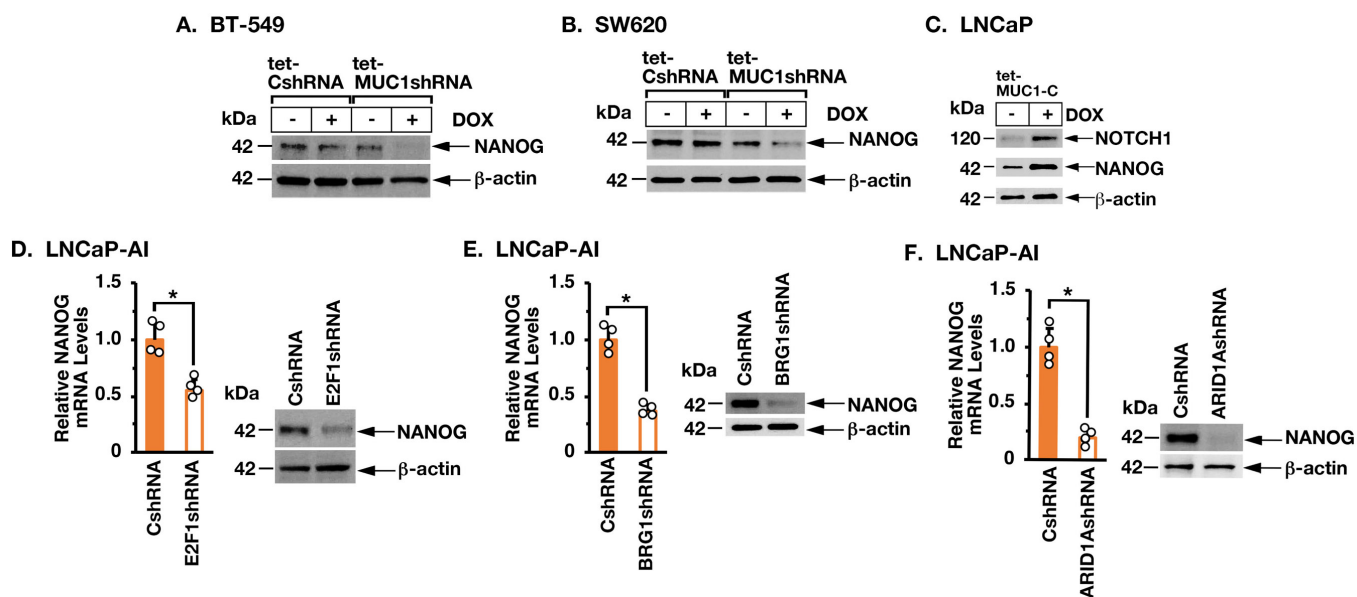

**Figure S8. Silencing MUC1-C downregulates NANOG in carcinoma cells.** A and B. BT-549 (A) and SW620 (B) cells expressing tet-CshRNA or tet-MUC1shRNA were treated with vehicle or DOX for 7 days. Lysates were immunoblotted with antibodies against the indicated proteins. C. LNCaP/tet-MUC1-C cells were treated with vehicle or DOX for 7 days. Lysates were immunoblotted with antibodies against the indicated proteins. D-F. LNCaP-AI/CshRNA, LNCaP-AI/E2F1shRNA (D), LNCaP-AI/BRG1shRNA (E) and LNCaP-AI/ARID1AshRNA (F) cells were analyzed for NANOG mRNA levels by qRT-PCR (left). The results (mean±SD of 4 determinations) are expressed as relative mRNA levels compared to that in control cells (assigned a value of 1). Lysates were immunoblotted with antibodies against the indicated proteins (right).

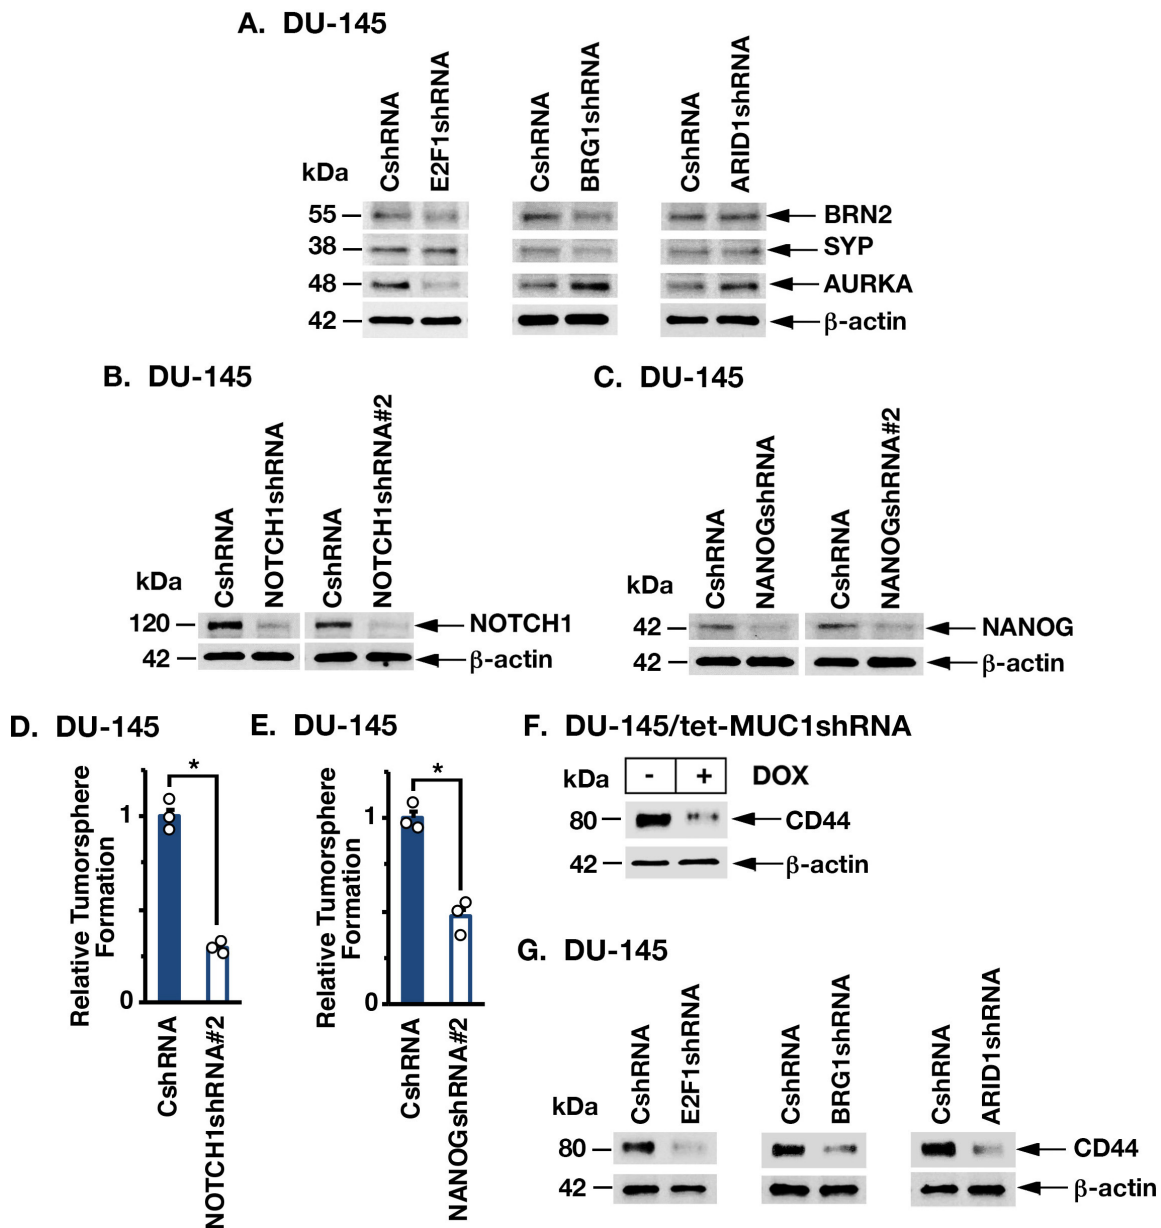

**Figure S9. Silencing the MUC1-C→E2F1→BAF→NOTCH1@NANOG pathway has little effect on NE differentiation markers and suppresses CD44 expression.** A. Lysates from DU-145/CshRNA, DU-145/E2F1shRNA (left), DU-145/BRG1shRNA (middle) and DU-145/ARID1A1shRNA (right) cells were immunoblotted with antibodies against the indicated proteins. B. Lysates from DU-145/CshRNA, DU-145/NOTCH1shRNA (left) and DU-145/NOTCH1shRNA#2shRNA (right) cells were immunoblotted with antibodies against the indicated proteins. C. Lysates from DU-145/CshRNA, DU-145/NANOGshRNA (left) and DU-145/NANOGshRNA#2shRNA (right) cells were immunoblotted with antibodies against the indicated proteins. D and E. DU-145 cells expressing a CshRNA, NOTCH1shRNA#2 (D) or NANOGshRNA#2 (E) were assayed for tumorsphere formation. The results (mean±SD of 3 biologic replicates) are expressed as relative tumorsphere number per field compared to the CshRNA control. F. Lysates from DU-145/tet-MUC1shRNA cells treated with vehicle or DOX for 7 days were immunoblotted with antibodies against the indicated proteins. G. Lysates from DU-145/CshRNA, DU-145/E2F1shRNA (left), DU-145/BRG1shRNA (middle) and DU-145/ARID1A1shRNA (right) cells were immunoblotted with antibodies against the indicated proteins.

## Supplemental Tables

**Table S1. Primers used for qRT-PCR.**

|               |            |                                      |
|---------------|------------|--------------------------------------|
| <b>MUC1-C</b> | <b>FWD</b> | TACCGATCGTAGCCCCTATG                 |
|               | <b>REV</b> | CTCACCAGCCCAAACAGG                   |
| <b>BRG1</b>   | <b>FWD</b> | CCAAGACCCTGATGAACACC                 |
|               | <b>REV</b> | GGCAGAACAGCAGCACTTT                  |
| <b>ARID1A</b> | <b>FWD</b> | ACCTCTATCGCCTCTATGTGTCTGT            |
|               | <b>REV</b> | CTGGCAGCACTGCTTGATGT                 |
| <b>NOTCH1</b> | <b>FWD</b> | GGGCTAACAAAGATATGCAG                 |
|               | <b>REV</b> | ACTGAACCTGACCGTACAGTTGGCAAAGTGGTCCAG |
| <b>HES1</b>   | <b>FWD</b> | AGATAGCTCGCGGCATTCCA                 |
|               | <b>REV</b> | CAGCACACTTGGGTCTGTGC                 |
| <b>HEY1</b>   | <b>FWD</b> | CATACGGCAGGAGGGAAAG                  |
|               | <b>REV</b> | GCATCTAGTCCTTCAATGATGCT              |
| <b>NANOG</b>  | <b>FWD</b> | AGAGGTGAAGACCTGGTCC                  |
|               | <b>REV</b> | GGTAGGTGCTGAGGCCTTCT                 |
| <b>GAPDH</b>  | <b>FWD</b> | CCATGGAGAAGGCTGGGG                   |
|               | <b>REV</b> | CAAAGTTGTCATGGATGACC                 |

**Table S2. Primers used for ChIP-qPCR.**

|                        |            |                          |
|------------------------|------------|--------------------------|
| <b>BRG1-Enhancer</b>   | <b>FWD</b> | TACGGTCCAGGGTTCCTATTT    |
|                        | <b>REV</b> | GGCAACTGGAGAATGGGAT      |
| <b>ARID1A-Intron 1</b> | <b>FWD</b> | ACATGGAAGAGGGAGGAGTAT    |
|                        | <b>REV</b> | GGGCAAGAGTAACCTTACAGAG   |
| <b>NANOG-Enhancer</b>  | <b>FWD</b> | CTGGGTTTGTCTTCAGGTTCT    |
|                        | <b>REV</b> | AATCCCGTCTACCAGTCTCA     |
| <b>GAPDH</b>           | <b>FWD</b> | TACTAGCGGTTTTACGGGCG     |
|                        | <b>REV</b> | TCGAACAGGAGGAGCAGAGAGCGA |

**Table S3. Stem Cell and NOTCH Datasets**

| Gene Set                                                   | DU-145/tet-MUC1shRNA |        |        | LNCaP-AI/tet-MUC1shRNA |        |        |
|------------------------------------------------------------|----------------------|--------|--------|------------------------|--------|--------|
|                                                            | NES                  | p-val  | p.adj  | NES                    | p-val  | p.adj  |
| <b>BHATTACHARYA_EMBRYONIC_STEM_CELL</b>                    | -1.3155              | 0.0711 | 0.3069 | -2.0050                | 0.0021 | 0.0272 |
| <b>BOQUEST_STEM_CELL_DN</b>                                | 1.6940               | 0.0016 | 0.0674 | 0.9489                 | 0.5664 | 0.7834 |
| <b>BOQUEST_STEM_CELL_UP</b>                                | 0.9270               | 0.6420 | 0.8162 | 1.3174                 | 0.0454 | 0.1878 |
| <b>GO_POSITIVE_REGULATION_OF_STEM_CELL_DIFFERENTIATION</b> | 1.0765               | 0.3957 | 0.6736 | 0.8429                 | 0.6900 | 0.8627 |
| <b>GO_STEM_CELL_DIFFERENTIATION</b>                        | 1.5714               | 0.0030 | 0.0747 | -0.8251                | 0.9581 | 0.9885 |
| <b>PID_NOTCH_PATHWAY</b>                                   | 1.1345               | 0.2602 | 0.5582 | 1.7883                 | 0.0121 | 0.0829 |
| <b>REACTOME_SIGNALING_BY_NOTCH</b>                         | 1.5408               | 0.0045 | 0.0925 | 1.4488                 | 0.0128 | 0.0844 |
| <b>WONG_EMBRYONIC_STEM_CELL_CORE</b>                       | -1.7093              | 0.0033 | 0.0753 | -2.1443                | 0.0024 | 0.0285 |
